# Supplementary material
Source: publisher figshare collection journal article supplement (https://acs.figshare.com/ndownloader/files/4529734)
Supplement: Supplementary file 1 [file 4529734]

**Supporting Information**

11 April, 2009

**Ms. No.: 1a-2009-011108**

**Quantitative Analysis of the Stability of Pd Dendrimer-  
Encapsulated Nanoparticles**

Emily V. Carino, Marc R. Knecht, and Richard M. Crooks

5 Pages

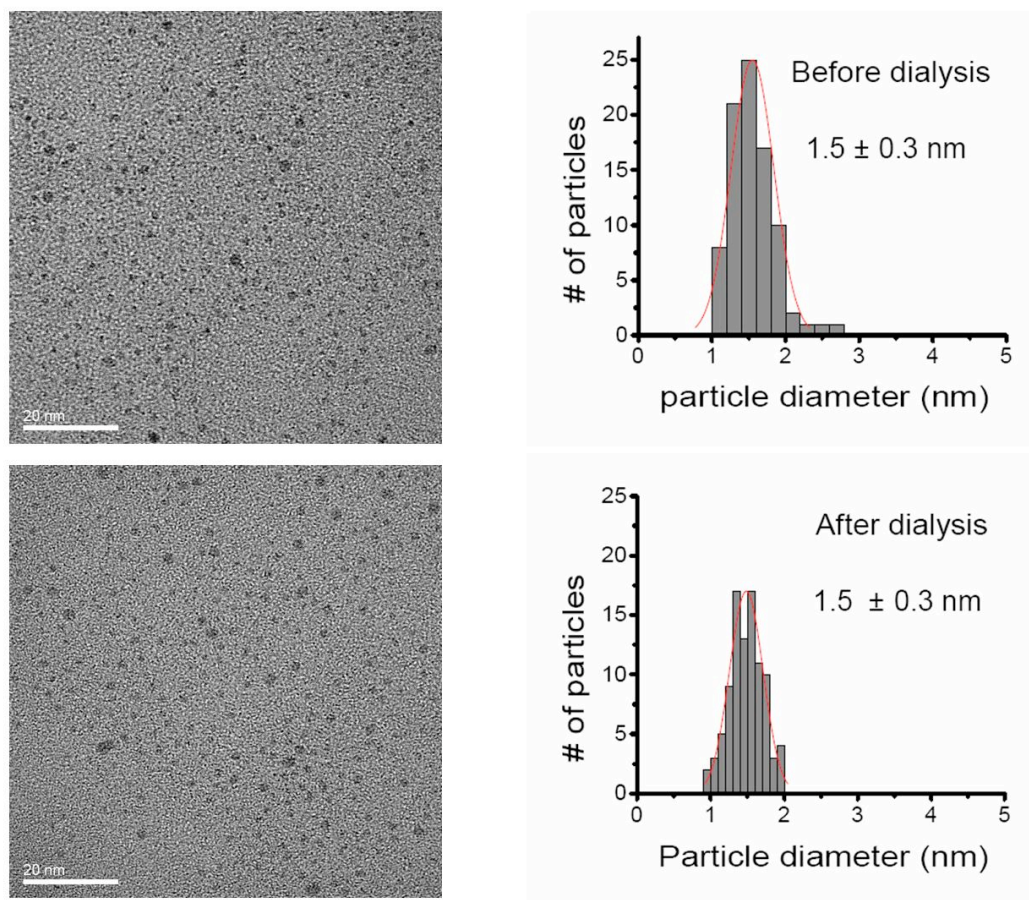

**Figure S1.** TEM images and size-distribution histograms for Pd DENs before and after dialysis. TEM grids were prepared as described in the experimental section. Particle diameters were measured manually using Digital Micrograph software and a histogram was constructed from the tabulated values of 100 particles using Microcal Origin.

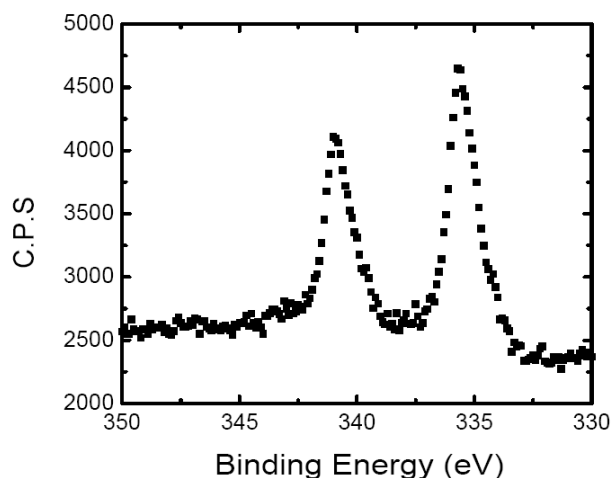

**Figure S2.** An X-ray photoelectron spectrrum (XPS) spectrum of freshly prepared G6-OH(Pd<sub>147</sub>) DENs. The peaks at 335.7 and 341.0 eV correspond to the 3d<sub>5/2</sub> peaks of Pd(0). XPS of freshly prepared 2.00  $\mu$ M G6-OH(Pd<sub>147</sub>) was performed using a Kratos Axis Ultra DLD spectrometer having a monochromatic Al K $\alpha$  X-ray source. The spectrum was obtained in charge-compensation mode at a pass energy of 20 eV, a resolution of 0.1 eV, and a dwell time of 1.00 s. The samples were prepared by drop-casting a freshly prepared 2.00  $\mu$ M Pd DEN solution onto Au-coated Si wafers. The wafers were dried under vacuum. To correct for charging, peak locations were referenced to the most intense carbon peak, assumed to be the C-N bond of the dendrimer, which is present at 286.0 eV.<sup>1,2</sup>

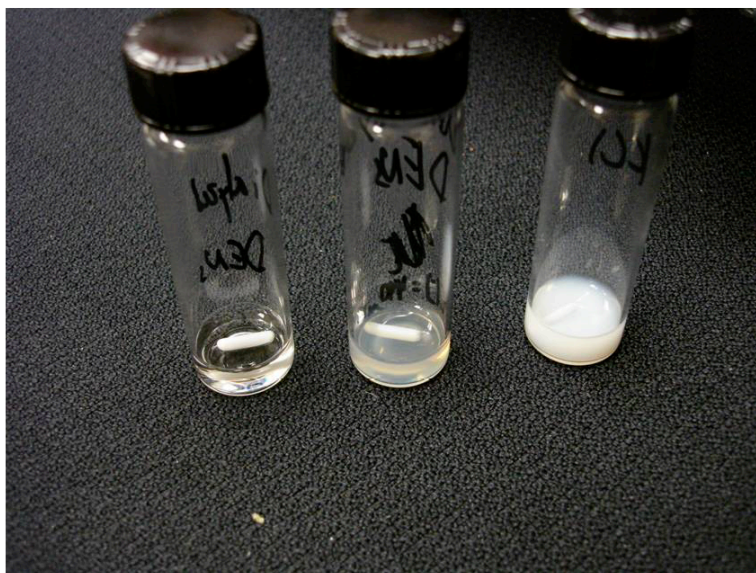

**Figure S3.** The results of the addition of  $\text{AgNO}_3$  to solutions containing dialyzed DENs (left), undialyzed DENs (center), and the KCl control (right) are shown. The calculated concentration of  $\text{Cl}^-$  in undialyzed  $2.0 \mu\text{M}$   $\text{G6-OH(Pd}_{147})$  DENs, introduced as  $\text{K}_2\text{PdCl}_4$  in the starting material, is  $1.18 \text{ mM}$ . The KCl control contained  $1.18 \text{ mM}$  of KCl in water. A ten-fold excess of  $\text{Ag}^+$ , with respect to this concentration of  $\text{Cl}^-$ , was added in the form of  $\text{AgNO}_3$  to each solution. The minimum detectable amount of  $\text{Cl}^-$  was determined from the solubility product of  $\text{AgCl}$  as  $13.4 \mu\text{M}$  using the following equilibrium equation, where  $K_{\text{sp}}$  is the solubility product for solid  $\text{AgCl}$  ( $1.8 \times 10^{-10}$ ).

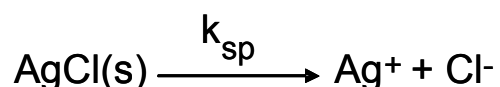

### **References**

1. Barr, T. L. *CRC Press* **1994**.
2. Lo, S. H. Y.; Wang, Y.-Y.; Wan, C.-C. *J. Colloid Interface Sci.* **2007**, *310*, 190-195.
